# Supplementary material for: A hybrid additive manufacturing platform to create bulk and surface composition gradients on scaffolds for tissue regeneration
Source: PubMed Central journal article supplement (PMC7820014; doi:10.1038/s41467-020-20865-y), 2021-01-21
Supplement: 41467_2020_20865_MOESM1_ESM.pdf [file 41467_2020_20865_MOESM1_ESM.pdf]

**Supplementary Information: A hybrid additive manufacturing platform to create bulk and surface composition gradients on scaffolds for tissue regeneration**

*Ravi Sinha, Maria Cámara-Torres, Paolo Scopece, Emanuele Verga Falzacappa, Alessandro Patelli, Lorenzo Moroni, Carlos Mota\**

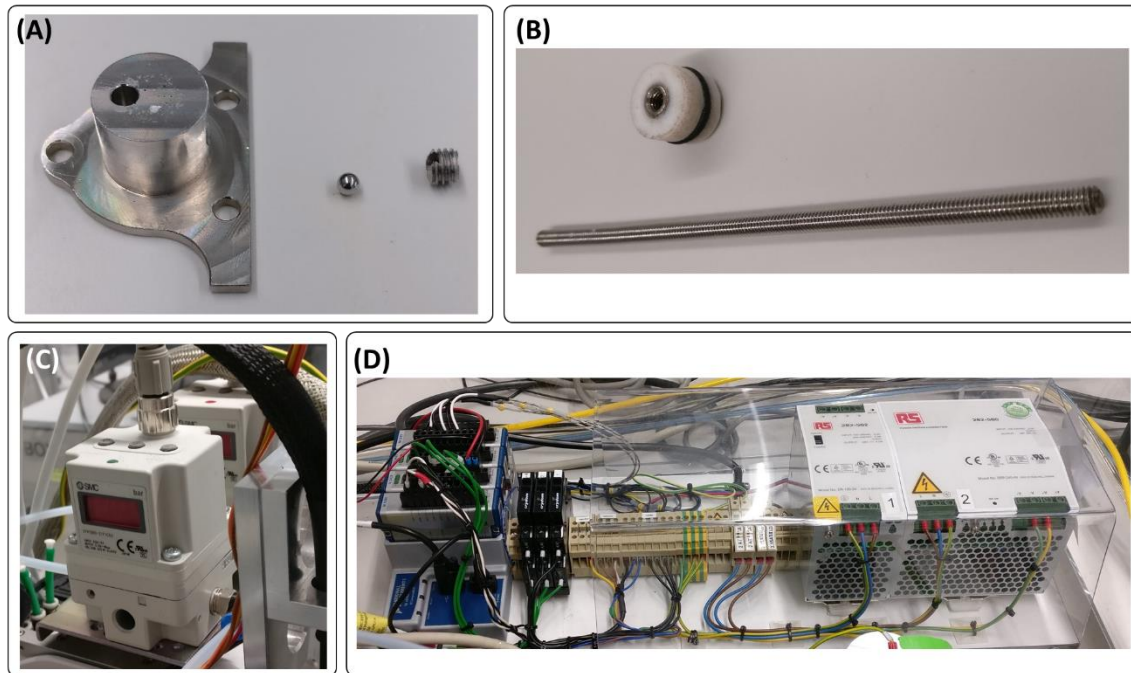

**Supplementary Figure 1. Several key supporting technologies enable the proper functioning of the printhead.** One-way valves (A) at the base of reservoirs prevent back-flows of materials into the other material's reservoir. Extractable plungers (B) allow reduction of left-over material in the reservoirs and new material feeding after the reservoirs are emptied. Individual pressure regulators (C) and pressure and temperature controllers (D) are critical to the printhead operation.

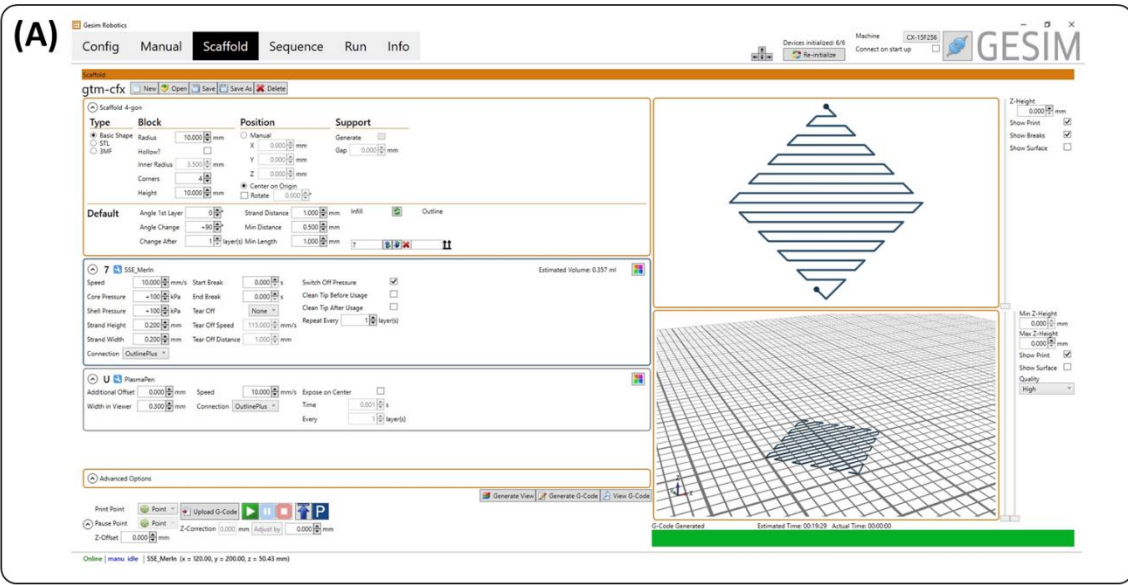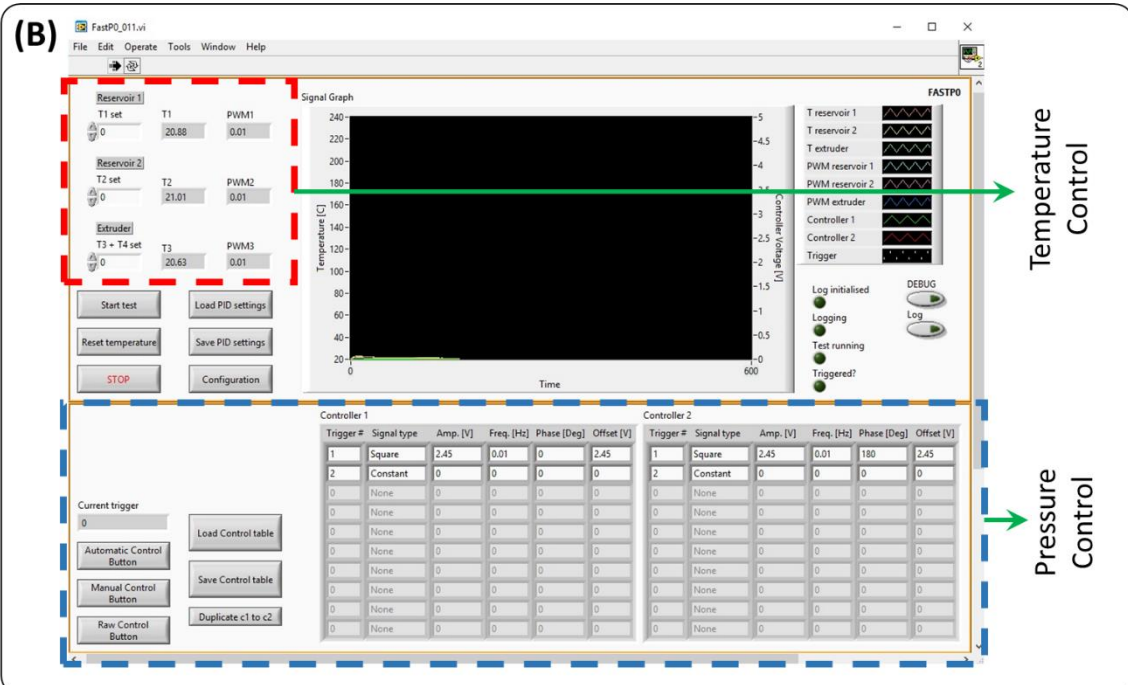

**Supplementary Figure 2. Customized software enable the application of the desired print control via a user-friendly interface.** The printer software interface (A) enables the desired print parameter entry and the automated generation of G-codes to appropriately move and trigger the printhead and the plasma jet. The temperature and pressure software interface (B) allows setting the printhead temperatures and the pressure profiles to be applied to each of the printhead reservoirs when triggered.

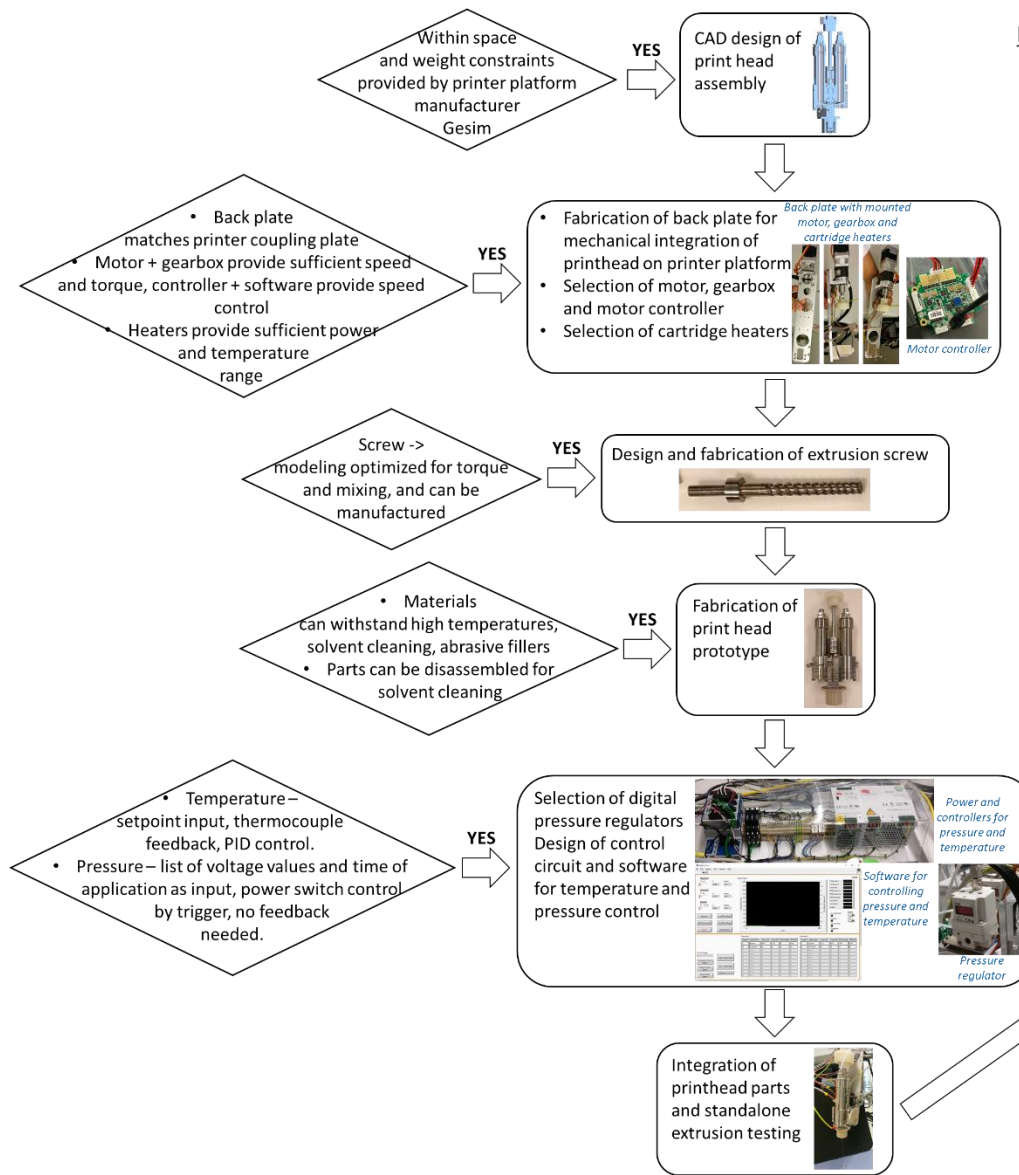

**Design Choices and Development Procedure**  
**Flowchart**

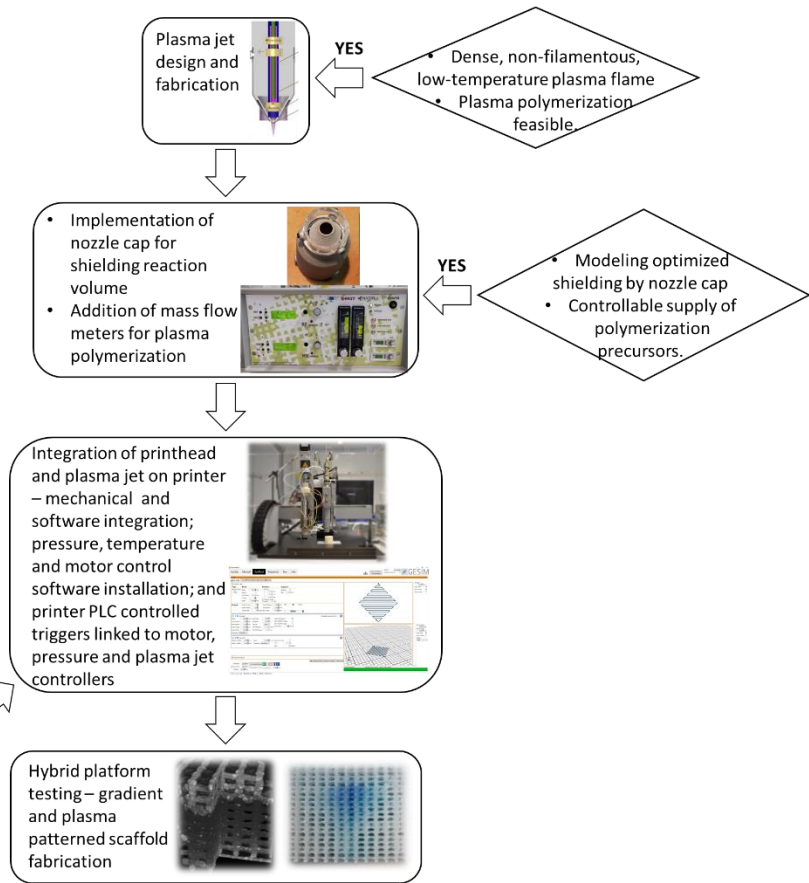

**Supplementary Figure 3. Flowchart summarizing design criteria and development procedure for the hybrid AM platform.**

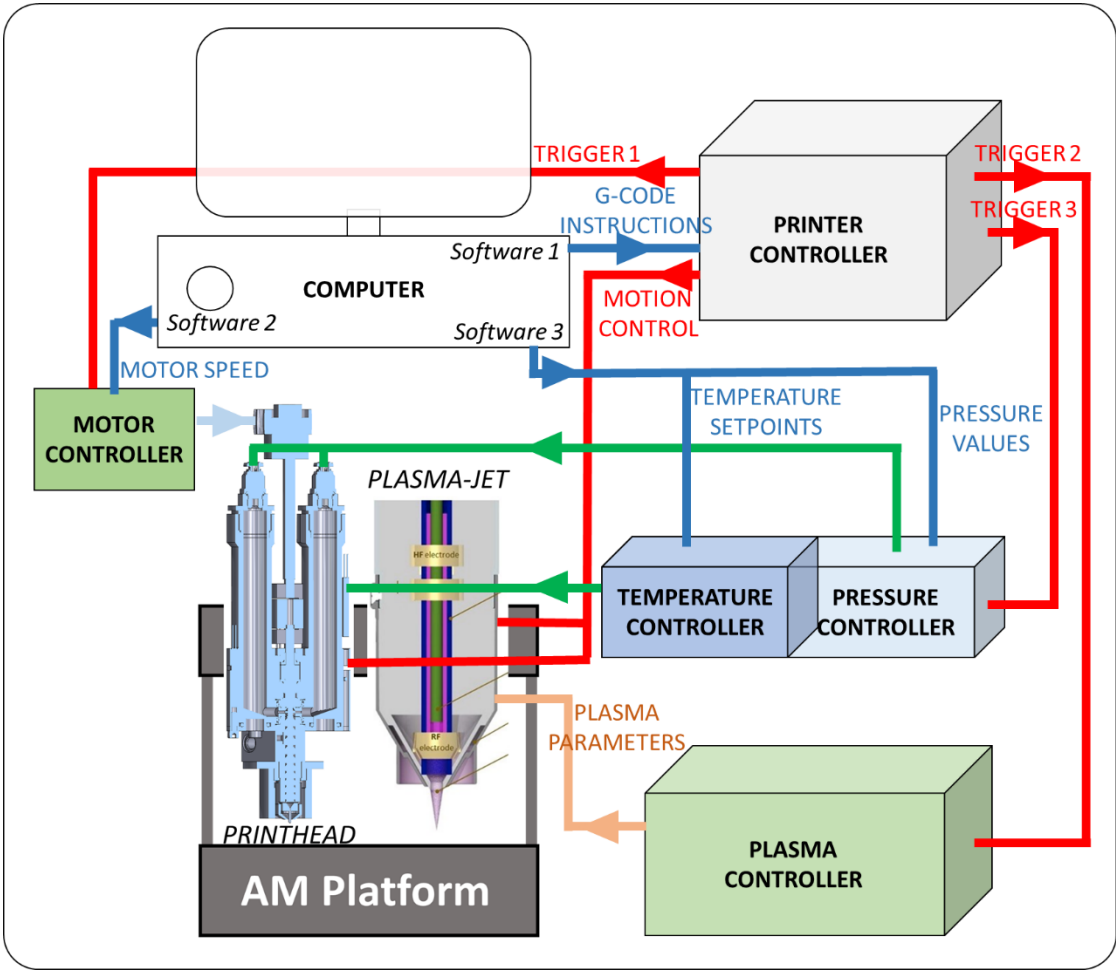

**Supplementary Figure 4. The links between the various units and the direction of flow of the control signals are shown schematically for the hybrid AM platform.**

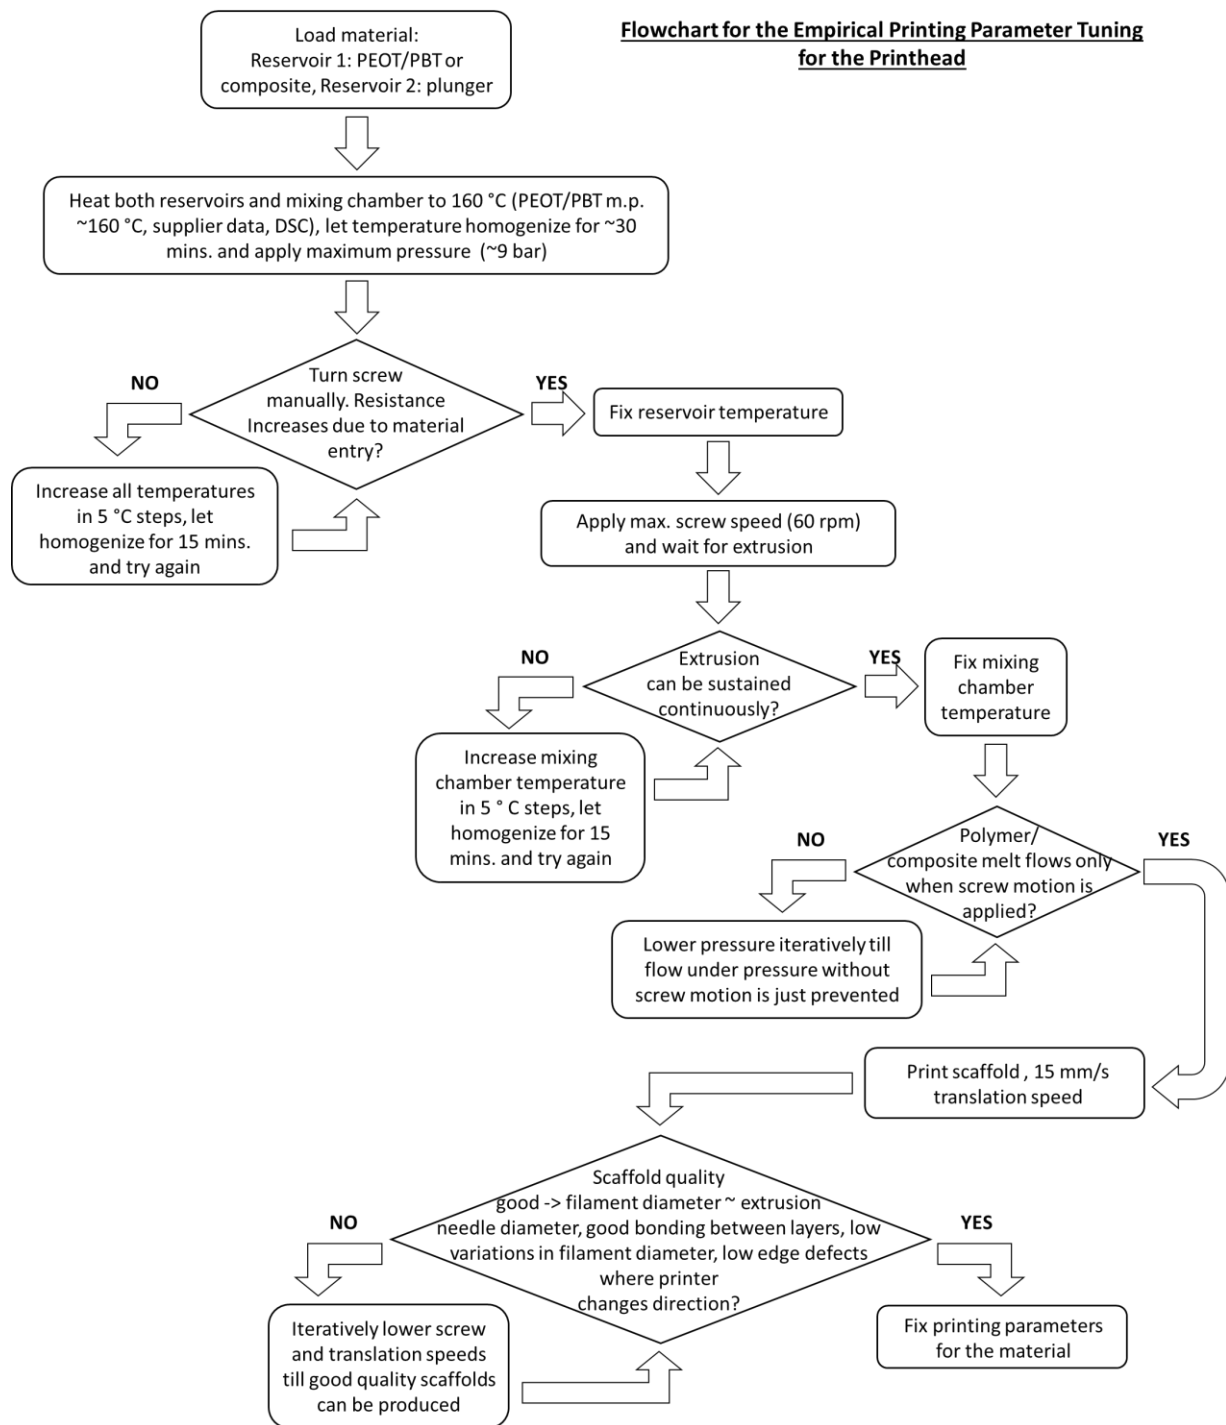

**Supplementary Figure 5. Flowchart summarizing how the printing parameters were determined empirically for each material.**

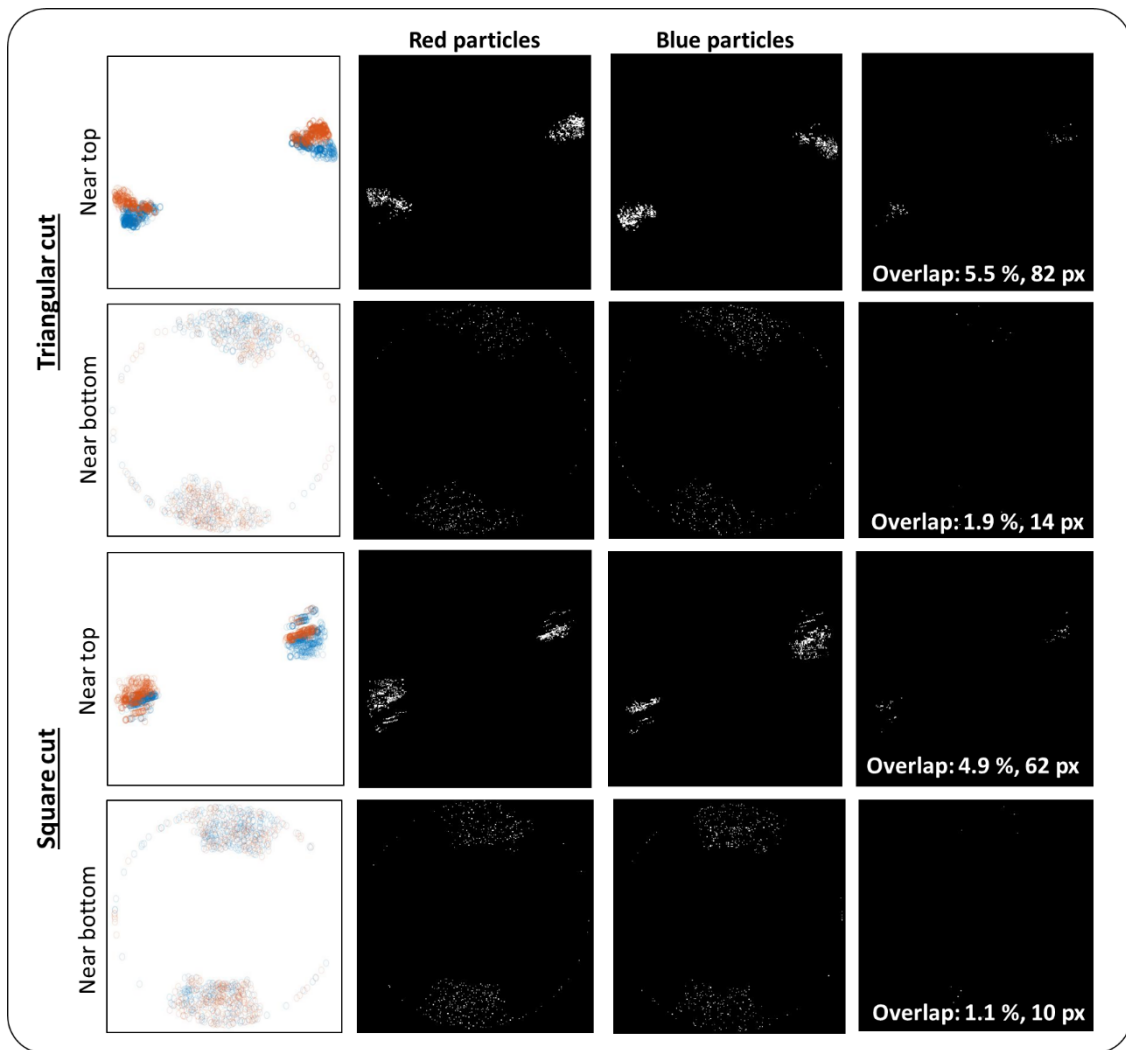

**Supplementary Figure 6. Degree of mixing was quantified for particle tracing models with screw rotation.** Qualitatively, both designs showed comparable good mixing near the bottom of the modelled screw section, but the overlap metric of mixing did not reflect it, due to the high reduction of particle numbers with increasing distance from the inlets.

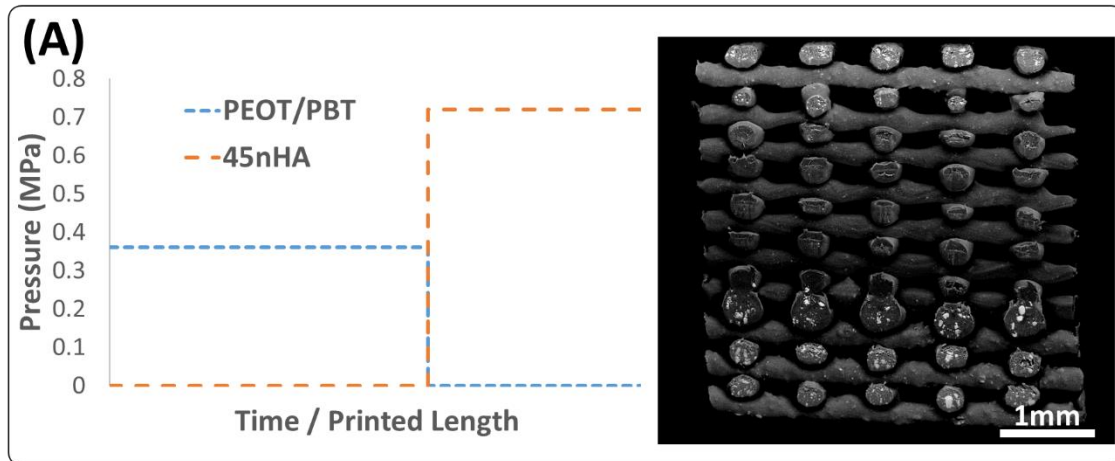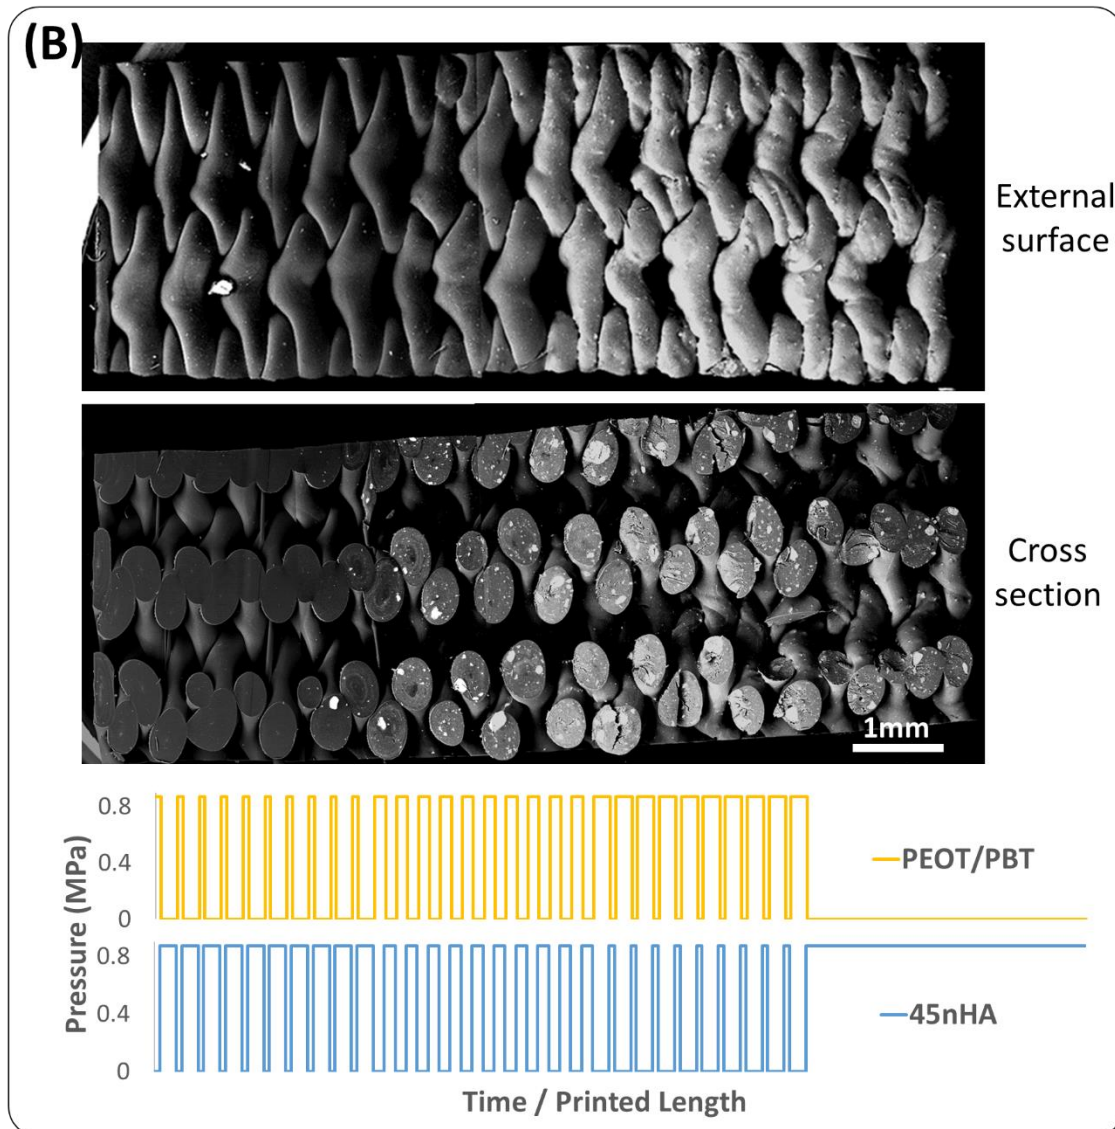

**Supplementary Figure 7. Continuous complete composition switches as well as sustained intermediate composition printing were demonstrated.** Back-scattered electron-mode scanning electron microscopy (BSE-SEM) images showing HA filler in contrast with the surrounding PEOT/PBT polymer demonstrated that continuous, smooth transitions between compositions could be made when pressures were alternatively applied to the two reservoirs for extended periods of time (A). Intermediate compositions could be sustained for a longer

duration by alternatively injecting materials into the screw and controlling their ratio by controlling the ratio of times each pressure is on (B).

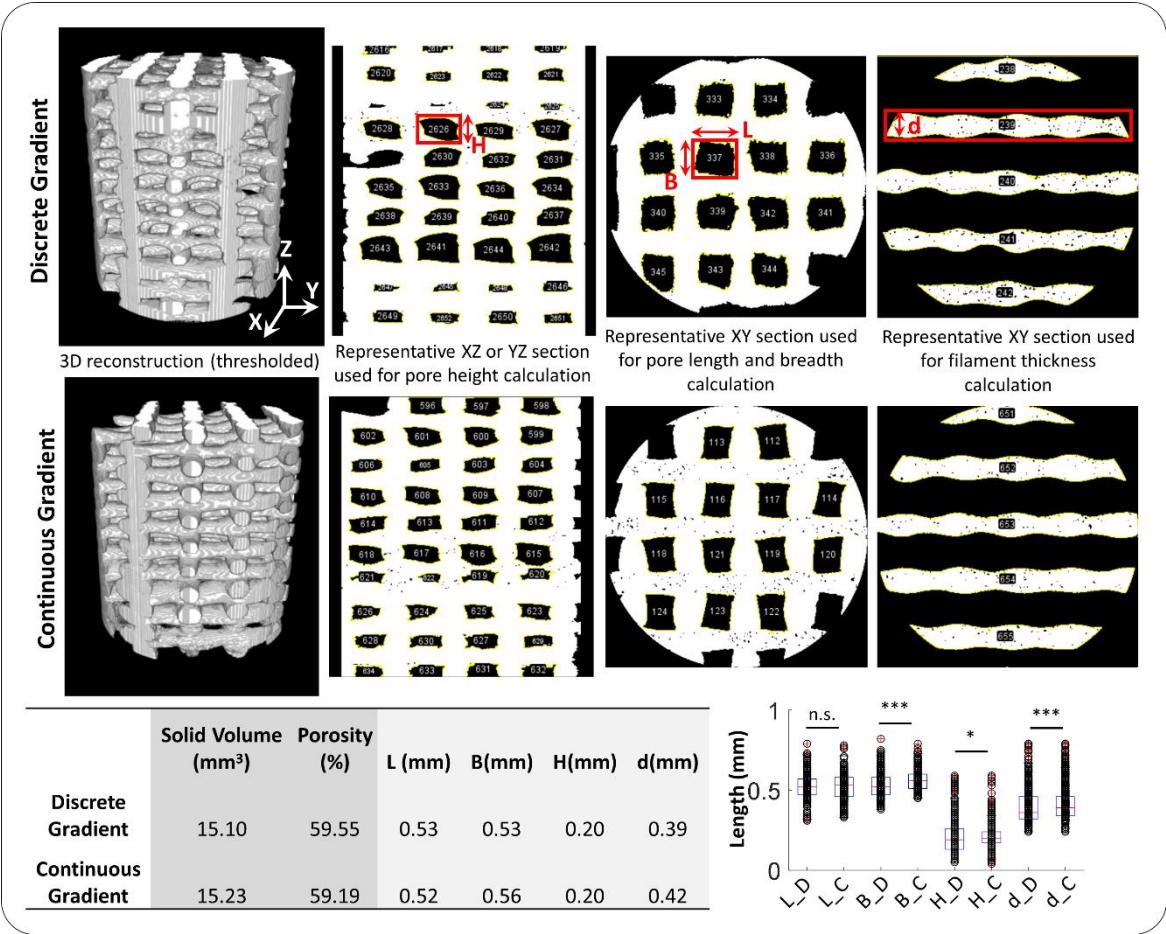

**Supplementary Figure 8. Microstructural analysis on representative discrete (D) and continuous (C) gradient scaffolds showed similar average pore sizes (L x B xH), filament diameters (d), and total solid volume and porosity for both scaffolds, as summarized in the table.** The differences between the single representative scaffolds in three dimension metrics (B, H, d) were statistically significant (\*, p<0.05, \*\*\*, p<0.001) and not significant (n.s.) for L, based on an unpaired t-test, assuming equal variance (n > 480 for all metrics). Representative images show which features were measured and plots mark median, upper and lower quartile values as boxes, maxima and minima as whiskers, outliers as red and all individual measurements as black points. Despite the statistical significance of differences, they were very small and not likely to affect the mechanical properties.



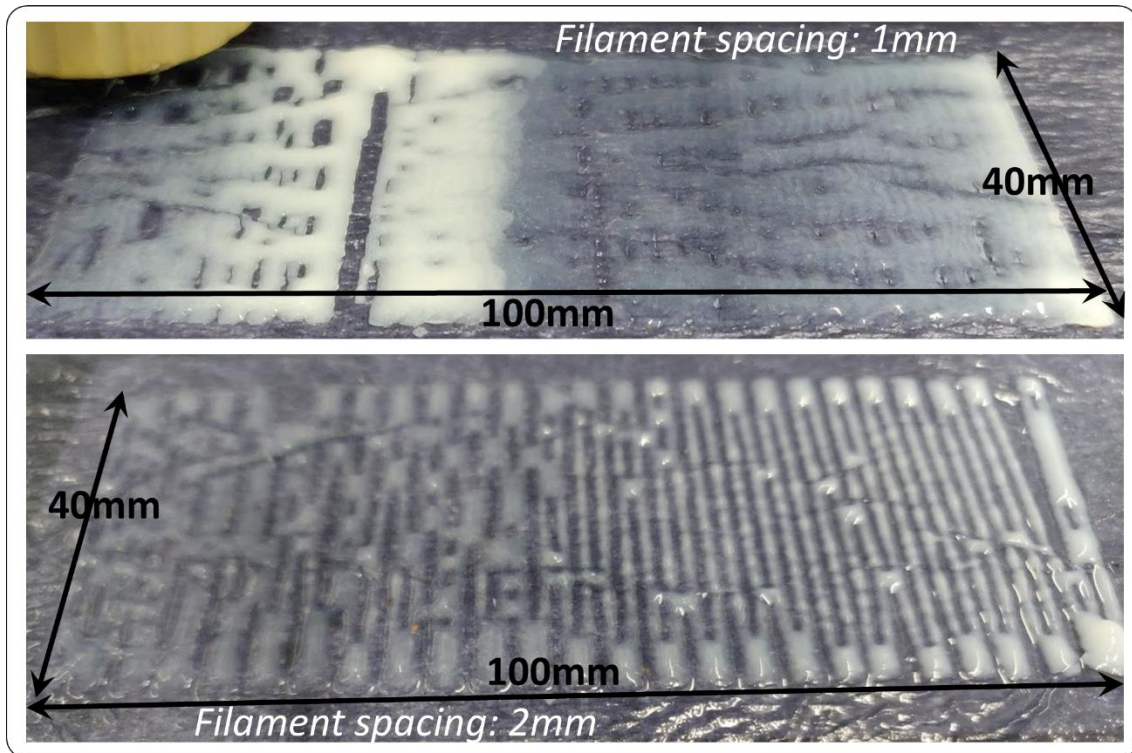

**Supplementary Figure 9. Continuous composition gradients can be printed using hydrogels.** Alginate gel loaded with hydroxyapatite (HA) was printed on calcium chloride-soaked tissue paper to gel the alginate. Gradients in HA composition could be produced using the printhead.

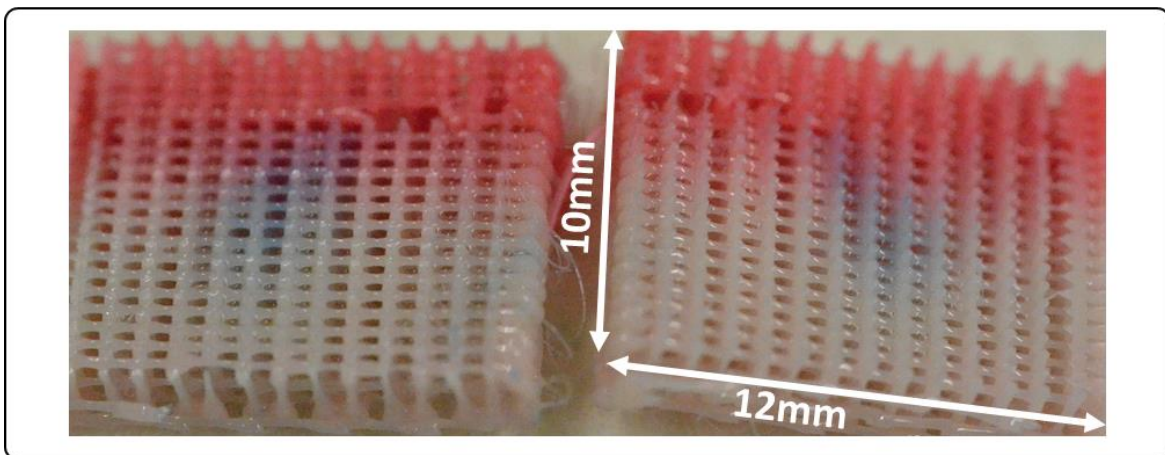

**Supplementary Figure 10. Bulk composition gradients can be combined with plasma patterning to simultaneously test for the response of cells to various conditions.** Dyed (pink) and non-dyed PEOT/PBT were used to generate the shown composition gradient scaffold, and the core of the scaffold was coated with plasma-polymerized VTMOs-MAA, which is visualized using methylene blue staining.

**Supplementary Table 1. Screw geometrical parameters used for the tested designs in the computational modeling–assisted screw operational torque minimization.** Column values, in mm, correspond to measurements shown in Figure 2A. Design no. 1 has the base dimensions and for the other designs, the parameter changed is highlighted in bold.

| Design No. | t        | D1         | D2         | p1       | p2       |
|------------|----------|------------|------------|----------|----------|
| 1          | 1.5      | 4.8        | 5.6        | 8        | 6        |
| 2          | <b>1</b> | 4.8        | 5.6        | 8        | 6        |
| 3          | <b>2</b> | 4.8        | 5.6        | 8        | 6        |
| 4          | 1.5      | <b>4.6</b> | 5.6        | 8        | 6        |
| 5          | 1.5      | <b>5</b>   | 5.6        | 8        | 6        |
| 6          | 1.5      | 4.8        | <b>5.4</b> | 8        | 6        |
| 7          | 1.5      | 4.8        | <b>5.8</b> | 8        | 6        |
| 8          | 1.5      | 4.8        | 5.6        | <b>7</b> | 6        |
| 9          | 1.5      | 4.8        | 5.6        | <b>9</b> | 6        |
| 10         | 1.5      | 4.8        | 5.6        | 8        | <b>5</b> |
| 11         | 1.5      | 4.8        | 5.6        | 8        | <b>7</b> |

**Supplementary Table 2. Printing parameters for various prints and scaffolds produced.**

| Scaffold type                 | PEOT/PBT temp. (°C) | PEOT/PBT + filler temp. (°C) | Mixing chamber temp. (°C) | PEOT/PBT pres. profile                 | PEOT/PB T + filler pres. profile       | Screw speed (rpm)               | Translation speed (mm/s)                                      | Starting Composition (w/ filler: w/o filler) | Extrusion needle inner diameter (µm) | Strand distance (µm) | Layer height (µm) |
|-------------------------------|---------------------|------------------------------|---------------------------|----------------------------------------|----------------------------------------|---------------------------------|---------------------------------------------------------------|----------------------------------------------|--------------------------------------|----------------------|-------------------|
| Empirical switching 45nHA     | 195                 | 210                          | 220                       | 0.88 MPa, 0.01 Hz sq. wave, phase 0    | 0.88 MPa, 0.01 Hz sq. wave, phase 180  | 30                              | 6                                                             | 50:50                                        | 400                                  | 1000                 | 320               |
| Empirical switching 10rGO     | 195                 | 220                          | 220                       | 0.45 MPa, 0.002 Hz sq. wave, phase 180 | 0.88 MPa, 0.002 Hz sq. wave, phase 0   | 60                              | 3                                                             | 50:50                                        | 250                                  | 1000                 | 200               |
| Empirical switching 20LDH-CFX | 195                 | 185                          | 195                       | 0.88 MPa, 0.01 Hz sq. wave, phase 0    | 0.88 MPa, 0.01 Hz sq. wave, phase 180  | 60                              | 10                                                            | 50:50                                        | 400                                  | 1000                 | 320               |
| Empirical switching 20ZrP-GTM | 195                 | 190                          | 195                       | 0.88 MPa, 0.005 Hz sq. wave, phase 0   | 0.88 MPa, 0.005 Hz sq. wave, phase 180 | 60                              | 6                                                             | 50:50                                        | 400                                  | 1000                 | 320               |
| Mech. Test – 45nHA            | 195                 | 210                          | 220                       | 0                                      | 0.72                                   | 60                              | 22.5                                                          | 100:0                                        | 250                                  | 750                  | 200               |
| Mech. Test – PEOT/PBT         | 195                 | 210                          | 220                       | 0.36                                   | 0                                      | 60                              | 17.5                                                          | 0:100                                        | 250                                  | 750                  | 200               |
| Mech. Test – HPH_C            | 195                 | 210                          | 220                       | 0.36 MPa for layers 1–13               | 0.72 MPa for layers 14–20              | 60                              | 17.5 for first 15 layers, 22.5 for next 5 layers              | 100:0                                        | 250                                  | 750                  | 200               |
| Mech. Test – HPH_D            | 195                 | 210                          | 220                       | 0.36 MPa for layers 1–5 and 16–20      | 0.72 MPa for layers 6–15               | 60                              | 17.5 for first 5 and last 5 layers, 22.5 for middle 10 layers | 100:0                                        | 250                                  | 750                  | 200               |
| Mech. Test – PHP_C            | 195                 | 210                          | 220                       | 0.54 MPa for layers 1–3 and 14–32      | 0.72 MPa for layers 4–13               | 20, varied manually a few times | 7.5 for layers 15–20, 15 for rest of the layers               | 0:100                                        | 340                                  | 850                  | 250               |
| Mech. Test – PHP_D            | 195                 | 210                          | 220                       | 0.54 MPa for layers 1–11 and 22–32     | 0.72 MPa for layers 12–21              | 20                              | 15                                                            | 0:100                                        | 340                                  | 850                  | 250               |
